# Supplementary material
Source: PubMed Central journal article supplement (PMC5610960)
Supplement: NIHMS906029-supplement-Erratum.pdf [file NIHMS906029-supplement-Erratum.pdf]

---

# Errata

---

In the May 2008 article “Signaling Noncomprehension of Language: A Comparison of Fragile X Syndrome and Down Syndrome,” by Abbeduto et al. (*AJMR*, Vol. 113, pp. 214–230), the following errors were made. First, the index of effect size was described in the *Results* as eta squared, whereas the values reported were actually for partial eta squared. Second, the value of the significant interaction of diagnostic group and number of referents reported on p. 222 should have been  $F(2, 52) = 3.39$  rather than  $F(2, 53) = 3.46$ . The significance level and effect size of the interaction were correctly reported.

---
